# Supplementary material
Source: Springer Nature journal article supplement (https://www.springermedizin.de/resource/supplementary/12960_2012_343_MOESM2_ESM.pdf/9569884)
Supplement: MOESM2 [file 9569884]

# Nursing professions

Entire country:

Number of:

Workers  
in nursing  
professions

X

Data source:  
German  
Microcensus  
(Labour Force  
Survey)

Region of interest:

Share of:

Full-time

X

1

Part-time

X

$\frac{\bar{X} \text{ (hours|part-time)}}{\bar{X} \text{ (hours|full-time)}}$

Data source: Labour Force Survey

Entire country:

FTEs depend on the  
region of interest:

= FTEs (full-time)

= FTEs (part-time)

$\Sigma$  FTEs
